# Supplementary material for: Transmission of HIV-1 Gag immune escape mutations is associated with reduced viral load in linked recipients
Source: PubMed Central journal article supplement — J Exp Med. 2008 May 12;205(5):1009–17. doi: 10.1084/jem.20072457 (PMC2373834; doi:10.1084/jem.20072457), 2008-05-12
Supplement: jem.20072457_1.pdf [file jem.20072457_1.pdf]

**Table S1.** HLA-I allele-associated HIV-1 polymorphisms not occurring within or near known CTL epitopes in chronically clade C-infected South Africans

| HIV-1 subregion         | Common mutations <sup>a</sup>     | Amino acid residue <sup>b</sup>              | Specific HLA-I association <sup>c</sup>          |
|-------------------------|-----------------------------------|----------------------------------------------|--------------------------------------------------|
| Gag-p17                 | RSILRGEKLDKWEKI                   | Gag 12                                       | A*74, P = $2.7 \times 10^{-14}$ ; q = 0          |
|                         | LDKWEKIRLRPGGKK                   | Gag20                                        | A*74, P = $6.5 \times 10^{-10}$ ; q = 0          |
|                         | YCVHEKIEVRDTKEA                   | Gag 93                                       | B*41, P = $9.4 \times 10^{-5}$ ; q = 0.05        |
| Gag-p24                 | NYPVQNQLQGQMVHQ                   | Gag 138                                      | B*5703, P = $3 \times 10^{-3}$ ; q = 0.15        |
|                         | LNTMLNTVGGHQAAAM                  | Gag 191                                      | A*3601, P = $2.8 \times 10^{-3}$ ; q = 0.15      |
|                         | GHQAAMQMLKDTINE                   | Gag 200                                      | A*01, P = $2.8 \times 10^{-3}$ ; q = 0.19        |
|                         | TINEEAAEWDRLLHPV                  | Gag 211                                      | Cw*1601, P = $9.6 \times 10^{-4}$ ; q = 0.09     |
|                         | INEEAAEWDRLLHPVH                  | Gag 212                                      | Cw*0501, P = $1.6 \times 10^{-3}$ ; q = 0.11     |
|                         | EAAEWDRLLHPVHAGP                  | Gag 215                                      | B*13, Cw*02, P = $2.1 \times 10^{-3}$ ; q = 0.14 |
|                         | EWDRLLHPVHAGPIAP                  | Gag 218                                      | A*6602, P = $5.9 \times 10^{-4}$ ; q = 0.07      |
|                         | WDRLLHPVHAGPIAPG                  | Gag 219                                      | Cw0704, P = $3.5 \times 10^{-4}$ ; q = 0.04      |
|                         | STLQEQIAWMTSNPP                   | Gag 248                                      | B*41, P = $1.6 \times 10^{-3}$ ; q = 0.12        |
|                         | DIYKRWIILGLNKIV                   | Gag 267                                      | B*5703, P = $1.8 \times 10^{-3}$ ; q = 0.11      |
|                         | SPVSILDIRQGPKEP                   | Gag 285                                      | A*6802, P = $1.4 \times 10^{-3}$ ; q = 0.11      |
|                         | WMTDTLLVQANPDC                    | Gag 323                                      | A*2902, P = $3 \times 10^{-3}$ ; q = 0.15        |
|                         | GPGHKARVLAEAMSQ                   | Gag 362                                      | A*6601, P = $1.1 \times 10^{-3}$ ; q = 0.1       |
| Nef                     | SSIVGWPA <b>VR</b> ERIRR          | Nef 15                                       | A*6801, P = $1.5 \times 10^{-4}$ ; q = 0.07      |
|                         | VPLRPM <b>TY</b> KAAFDLS          | Nef 81                                       | Cw*0702, P = $7 \times 10^{-4}$ ; q = 0.18       |
|                         | LKEKGGLE <b>I</b> YSKKRQ          | Nef 98                                       | A*2301, P = $5.6 \times 10^{-4}$ ; q = 0.12      |
|                         | KLVPVDP <b>RE</b> VEEANK          | Nef 151                                      | A*2301, P = $3.1 \times 10^{-4}$ ; q = 0.13      |
|                         | D <b>PRE</b> VEEANKGENNC          | Nef 156                                      | Cw*0802, P = $4.1 \times 10^{-4}$ ; q = 0.13     |
|                         | PREVEE <b>AN</b> KGENNCL          | Nef 157                                      | B*13, P = $1.4 \times 10^{-3}$ ; q = 0.18        |
|                         | NNCLL <b>HP</b> MSQHG <b>MED</b>  | Nef 168                                      | B*4201, P = $3.8 \times 10^{-4}$ ; q = 0.09      |
|                         | HPMSQHG <b>ME</b> DEEREV          | Nef 173                                      | B*4201, P = $7.1 \times 10^{-4}$ ; q = 0.16      |
|                         | SQHG <b>ME</b> DEEREVLKW          | Nef 176                                      | B*4403, P = $1.7 \times 10^{-6}$ ; q = 0         |
|                         | DEEREVL <b>K</b> WKF <b>D</b> SSL | Nef 182                                      | Cw*0804, P = $5.8 \times 10^{-4}$ ; q = 0.16     |
|                         | F <b>D</b> SSLARRHLARELH          | Nef 192                                      | A*74, P = $4.7 \times 10^{-5}$ ; q = 0.03        |
| RHLAREL <b>HP</b> EYKDC | Nef 199                           | Cw*1601, P = $3.7 \times 10^{-7}$ ; q = 0.09 |                                                  |

These data are taken from 82 HLA associations (q < 0.2) defined in a clade C South African cohort (unpublished data), in which analysis of gag sequences was performed using data from 672 study subjects and analysis of nef sequences was performed using data from 443 study subjects. The Los Alamos National Laboratory HIV Molecular Immunology Database (available at <http://www.hiv.lanl.gov/content/index>) was used to define known CTL epitopes.

<sup>a</sup>HLA-associated mutations (bolded) are shown.

<sup>b</sup>Protein and amino acid numbering of the bolded polymorphism are based on the HXB2 sequence

<sup>c</sup>Methods for calculating p- and q- values have been previously described (Bhattacharya, T., M. Daniels, D. Heckerman, B. Foley, N. Frahm, C. Kadie, J. Carlson, K. Yusim, B. McMahon, B. Gaschen, et al. 2007. *Science*. 315:1583–1586). The HLA-I restriction of the Gag 215 mutation could not be resolved between B\*13 or Cw\*02.
